# Supplementary material for: Generation and analysis of transcriptomic resources for a model system on the rise: the sea anemone Aiptasia pallida and its dinoflagellate endosymbiont
Source: PubMed Central journal article supplement (PMC2702317; doi:10.1186/1471-2164-10-258), 2009-06-05
Supplement: 1471-2164-10-258-S1.pdf [file 1471-2164-10-258-S1.pdf]

### Quality control and assembly statistics.

| Sequence type                | number | discarded by |
|------------------------------|--------|--------------|
| ESTs                         | 12,896 |              |
| Low quality ESTs             | 2,210  | Lucy         |
| short or no insert sequences | 210    | Lucy         |
| vector sequences             | 132    | Lucy         |
| only poly-A                  | 4      | Lucy         |
| short sequences              | 2      | seqclean     |
| short sequences              | 53     | seqclean     |
| High-quality ESTs            | 10,285 |              |
| <b>Assembly statistics</b>   |        |              |
| Contigs                      | 1,427  |              |
| Singletons                   | 3,498  |              |
| UniSeqs                      | 4,925  |              |
| Unigenes*                    | 2,564  |              |

\* estimated by assembling reverse reads only
