# Supplementary material for: Generation and analysis of transcriptomic resources for a model system on the rise: the sea anemone Aiptasia pallida and its dinoflagellate endosymbiont
Source: PubMed Central journal article supplement (PMC2702317; doi:10.1186/1471-2164-10-258), 2009-06-05
Supplement: 1471-2164-10-258-S3.pdf [file 1471-2164-10-258-S3.pdf]

## Detailed EST (N=10,285) distribution and assignment.

| Type of UniSeq                                                             | #     | Best BLASTx hit | If best hit is "other", then evalue | If evalue is equal, then % sim is | Prediction assignment                | # of ESTs (%) |
|----------------------------------------------------------------------------|-------|-----------------|-------------------------------------|-----------------------------------|--------------------------------------|---------------|
| Contig                                                                     | 775   | Cnidaria        |                                     |                                   | BBH=Cnidaria                         | 4,029 (39.17) |
| Contig                                                                     | 32    | Alveolata       |                                     |                                   | BBH=Alveolata                        | 88 (0.86)     |
| Contig                                                                     | 144   | other           | is smaller for Cnidaria             |                                   | evalue(Cnidaria) < evalue(Alveolata) | 540 (5.25)    |
| Contig                                                                     | 63    | other           | is smaller for Alveolata            |                                   | evalue(Alveolata) < evalue(Cnidaria) | 228 (2.22)    |
| Contig                                                                     | 14    | other           | equal                               | higher for Cnidaria               | sim%(Cnidaria) > sim%(Alveolata)     | 576 (5.60)    |
| Contig                                                                     | 7     | other           | equal                               | higher for Alveolata              | sim%(Alveolata) > sim%(Cnidaria)     | 27 (0.26)     |
| Contig                                                                     | 2     | other           | equal                               | equal                             | no assignment                        | 5 (0.05)      |
| Contig                                                                     | 390   | no hit          |                                     |                                   | no hit                               | 1,294 (12.58) |
| Singlet with sister read predicted as BBH=Cnidaria                         | 330   |                 |                                     |                                   | BBH=Cnidaria                         | 330 (3.21)    |
| Singlet with sister read predicted as BBH=Alveolata                        | 2     |                 |                                     |                                   | BBH=Alveolata                        | 2 (0.02)      |
| Singlet with sister read predicted as evalue(Cnidaria) < evalue(Alveolata) | 17    |                 |                                     |                                   | evalue(Cnidaria) < evalue(Alveolata) | 17 (0.17)     |
| Singlet with sister read predicted as evalue(Alveolata) < evalue(Cnidaria) | 14    |                 |                                     |                                   | evalue(Alveolata) < evalue(Cnidaria) | 14 (0.14)     |
| Singlet with sister read predicted as sim%(Cnidaria) > sim%(Alveolata)     | 8     |                 |                                     |                                   | sim%(Cnidaria) > sim%(Alveolata)     | 8 (0.08)      |
| Singlet that hit Cnidaria or Alveolata                                     | 1,401 | Cnidaria        |                                     |                                   | BBH=Cnidaria                         | 1,401 (13.62) |
| Singlet that hit Cnidaria or Alveolata                                     | 89    | Alveolata       |                                     |                                   | BBH=Alveolata                        | 89 (0.87)     |
| Singlet that hit other with sister read in Contig that has no hit          | 36    | other           | is smaller for Cnidaria             |                                   | evalue(Cnidaria) < evalue(Alveolata) | 36 (0.35)     |
| Singlet that hit other with sister read in Contig that has no hit          | 30    | other           | is smaller for Alveolata            |                                   | evalue(Alveolata) < evalue(Cnidaria) | 30 (0.29)     |
| Singlet that hit other with sister read in Contig that has no hit          | 4     | other           |                                     | higher for Cnidaria               | sim%(Cnidaria) > sim%(Alveolata)     | 4 (0.04)      |
| Singlet that hit other with sister read in Contig that has no hit          | 4     | other           |                                     | higher for Alveolata              | sim%(Alveolata) > sim%(Cnidaria)     | 4 (0.04)      |
| Singlet that hit other and have no sister reads in Contigs                 | 254   | other           | is smaller for Cnidaria             |                                   | evalue(Cnidaria) < evalue(Alveolata) | 254 (2.47)    |
| Singlet that hit other and have no sister reads in Contigs                 | 131   | other           | is smaller for Alveolata            |                                   | evalue(Alveolata) < evalue(Cnidaria) | 131 (1.27)    |
| Singlet that hit other and have no sister reads in Contigs                 | 45    | other           |                                     | higher for Cnidaria               | sim%(Alveolata) > sim%(Cnidaria)     | 45 (0.44)     |
| Singlet that hit other and have no sister reads in Contigs                 | 30    | other           |                                     | higher for Alveolata              | sim%(Cnidaria) > sim%(Alveolata)     | 30 (0.29)     |
| Singlet with no hit (sister read is in Contig)                             | 571   | no hit          |                                     |                                   | no hit                               | 571 (5.55)    |
| Singlet with no hit (neither sister read is in Contig)                     | 532   | no hit          |                                     |                                   | no hit                               | 532 (5.17)    |
