# Supplementary material for: Generation and analysis of transcriptomic resources for a model system on the rise: the sea anemone Aiptasia pallida and its dinoflagellate endosymbiont
Source: PubMed Central journal article supplement (PMC2702317; doi:10.1186/1471-2164-10-258), 2009-06-05
Supplement: 1471-2164-10-258-S4.pdf [file 1471-2164-10-258-S4.pdf]

**Genes that were studied in the context of cnidarian-dinoflagellate symbiosis, but not found in this study.**

| <b>Gene</b>                                                                                                      | <b>Reference</b>                     |
|------------------------------------------------------------------------------------------------------------------|--------------------------------------|
| <i>Aiptasia pallida</i> cyclophilin mRNA, complete cds                                                           | Perez and Weis 2008                  |
| <i>Aiptasia pallida</i> caspase-like protein mRNA, complete cds                                                  | Dunn <i>et al.</i> 2006              |
| <i>Aiptasia pallida</i> abhp mRNA, complete cds                                                                  | Dunn <i>et al.</i> 2006              |
| <i>Anthopleura elegantissima</i> copper/zinc superoxide dismutase-like protein mRNA, complete cds.               | Rodriguez-Lanetty <i>et al.</i> 2006 |
| <i>Anthopleura elegantissima</i> prohibitin protein-like protein mRNA, partial cds                               | Rodriguez-Lanetty <i>et al.</i> 2006 |
| <i>Anthopleura elegantissima</i> sphingosine 1-phosphate phosphatase 2-like protein-like mRNA, complete sequence | Rodriguez-Lanetty <i>et al.</i> 2006 |
| <i>Anemonia viridis</i> copper/zinc superoxide dismutase CuZnSODa mRNA, complete cds                             | Plantivaux <i>et al.</i> 2004        |
| <i>Anemonia viridis</i> copper/zinc superoxide dismutase CuZnSODb mRNA, complete cds                             | Plantivaux <i>et al.</i> 2004        |
